# Supplementary material for: Brassinosteroid signaling directs formative cell divisions and protophloem differentiation in Arabidopsis root meristems
Source: Oxford University Press journal article supplement (doi:10.1242/dev.145623), 2017-01-15
Supplement: dev145623supp.pdf [file dev145623supp.pdf]

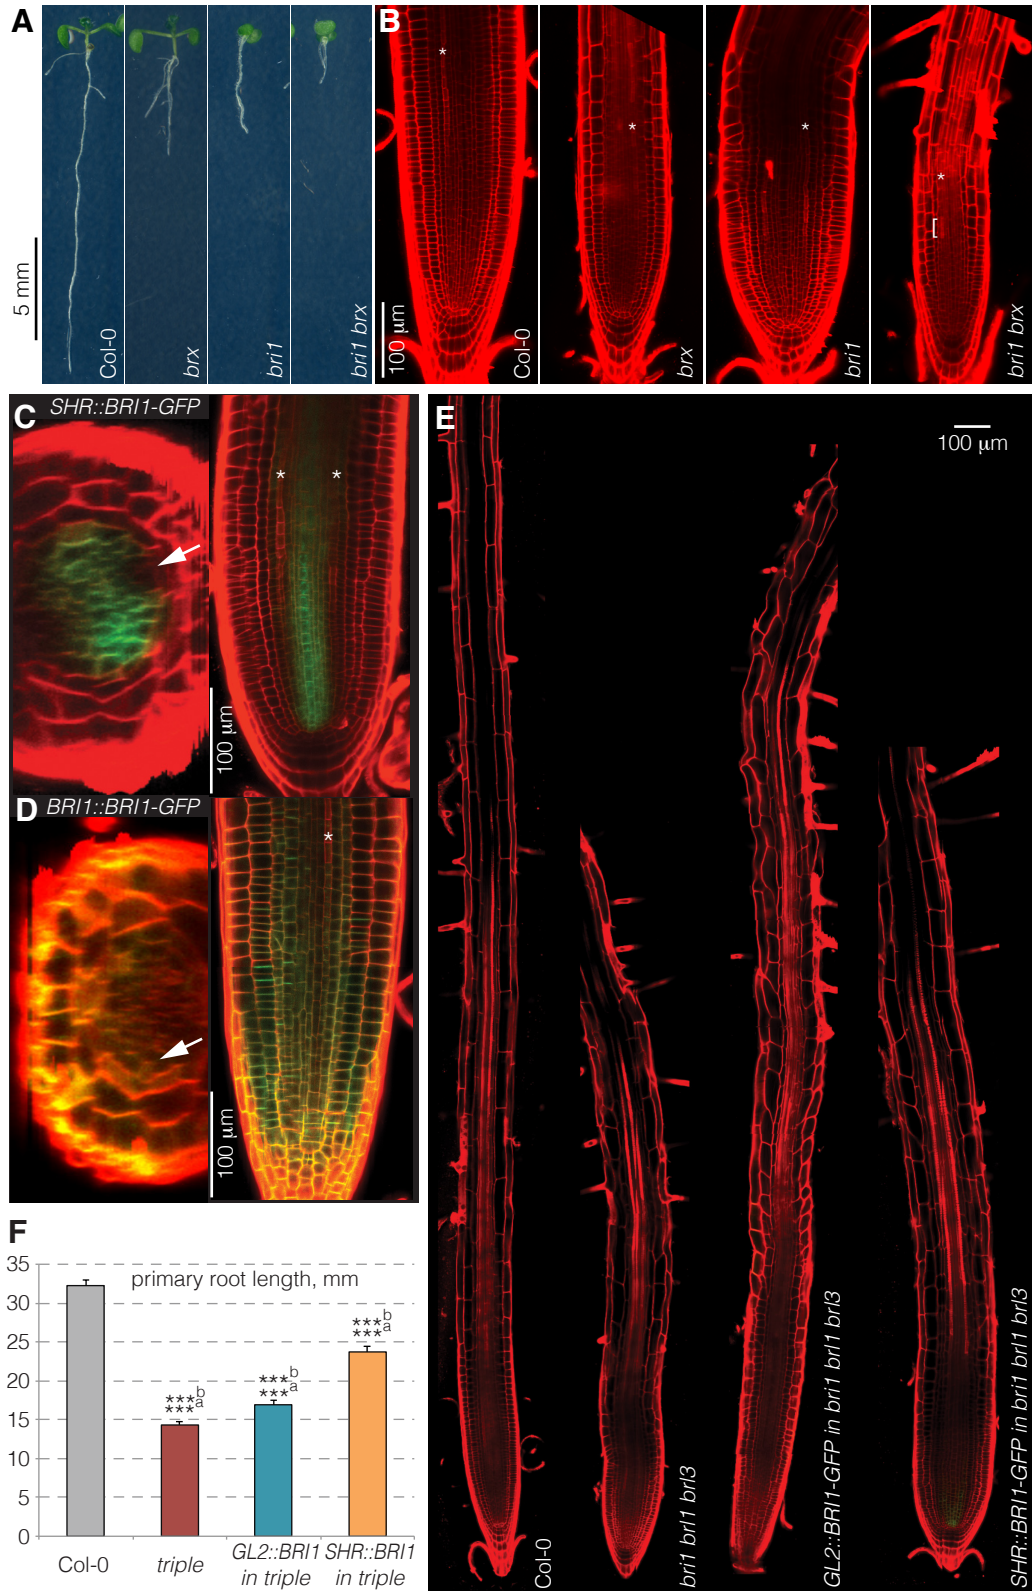

**Fig. S1. Supplementary figure.** (A) 7-day-old Col-0, *brx* and *bri1* single mutant and *brx bri* double mutant seedlings. (B) Confocal microscopy images of the root meristems of genotypes in (A). Asterisks mark protophloem sieve element strands. Bracket in *brx bri1* highlights the only two sieve element cells that appear to differentiate normally in this strand. (C) Confocal microscopy image of *bri1 brl1 brl3* mutant root meristem expressing a *BRI1-GFP* transgene under control of the *SHR* promoter (overlay). GFP signal: green. Propidium iodide signal: red. Left: optical section, arrow points out the phloem pole. Right: longitudinal view, asterisks mark protophloem sieve element strands. (D) Confocal microscopy images of Col-0 wild type root meristem expressing a *BRI1::BRI1-GFP* transgene. GFP signal: green. Propidium iodide signal: red. Left: optical section, arrow points out the phloem pole. Right: longitudinal view, asterisk marks a protophloem sieve element strand. (E) Confocal microscopy images of propidium iodide-stained roots from 5-day-old plants. (F) Root length of 7-day-old seedlings. Differences are not statistically significant unless indicated. (student's t-test); \*\*\* =  $p < 0.001$ ; <sup>a</sup>: versus Col-0; <sup>b</sup>: versus *bri1 brl1 brl3*; (D) shows mean  $\pm$  s.e.m.

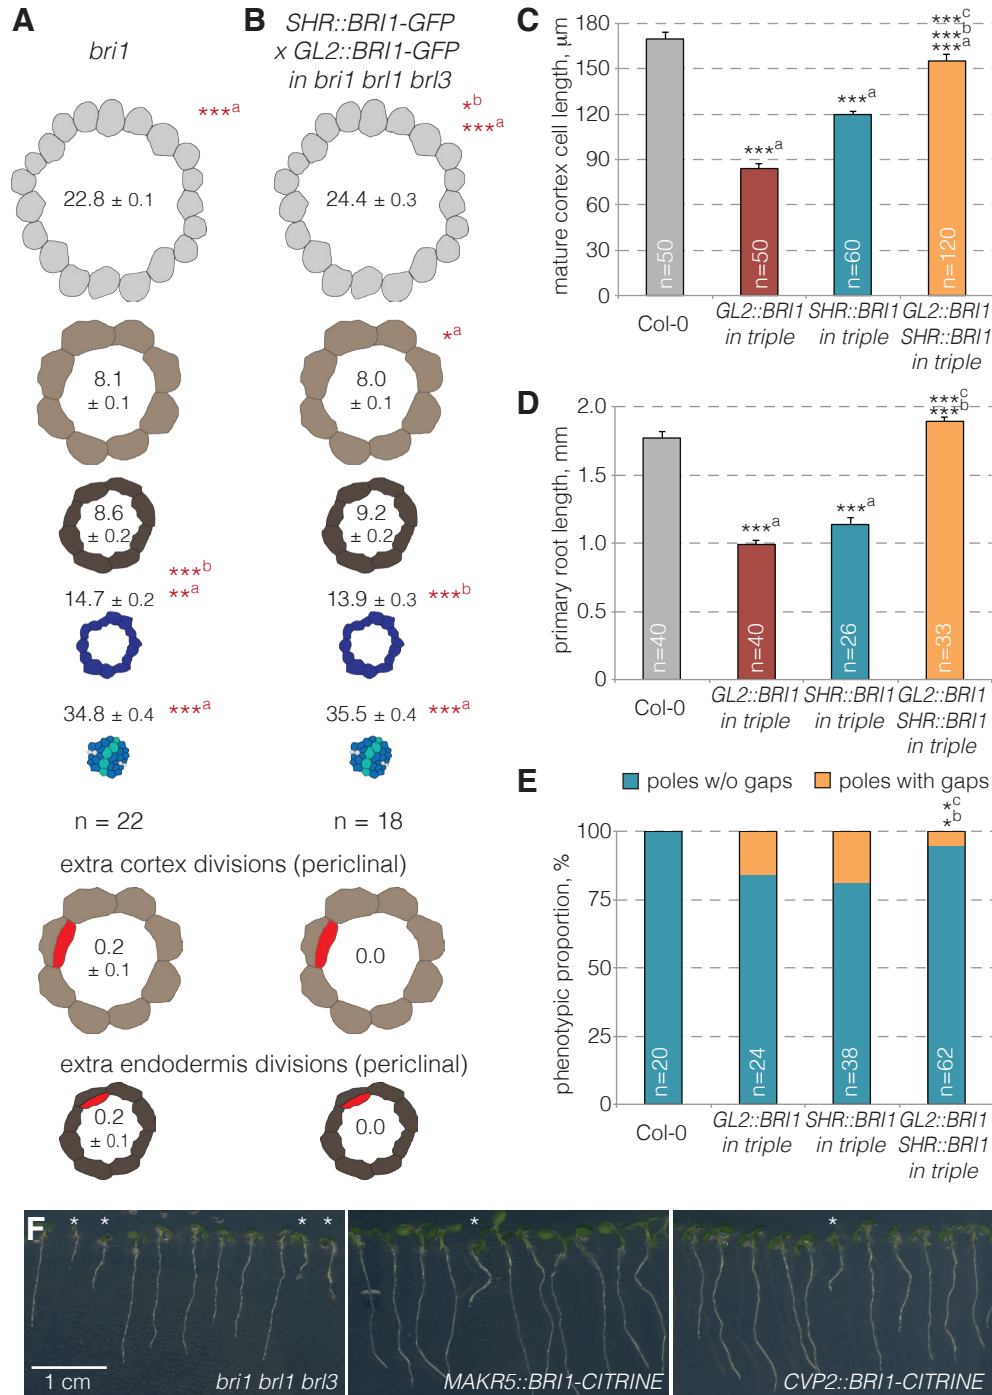

**Fig. S2. Supplementary figure.** Quantification of cell number in the different tissue layers and of extra cortex or endodermis divisions, similar to Figure 4C and D, for (A) *bri1* single mutants, and (B) F1 plants derived from crosses between *GL2::BRI1-GFP<sup>triple</sup>* and *SHR::BRI1-GFP<sup>triple</sup>* plants. (C-E) Mature cortex cell length (C), root length (D) and gap cell frequency (E) in F1 plants derived from crosses between *GL2::BRI1-GFP<sup>triple</sup>* and *SHR::BRI1-GFP<sup>triple</sup>* plants, and their parental lines. (F) 8-day-old seedlings, progeny of *brl1 -/- brl3 -/- bri1 +/-* plants, or *brl1 -/- brl3 -/- bri1 +/-* plants that carried indicated transgenes in hemizygous state, segregating *bri1 brl1 brl3* triple mutants (asterisks). Differences are not statistically significant unless indicated. (student's t-test); \* = p < 0.05; \*\* = p < 0.01; \*\*\* = p < 0.001; (A-B): <sup>a</sup>: versus Col-0; <sup>b</sup>: versus *bri1 brl1 brl3*; (C-E): <sup>a</sup>: versus Col-0; <sup>b</sup>: versus *GL2::BRI1-GFP<sup>triple</sup>*; <sup>c</sup>: versus *SHR::BRI1-GFP<sup>triple</sup>*; (A-D) indicates mean ± s.e.m.
